# Supplementary material for: BCKDK modification enhances the anticancer efficacy of CAR-T cells by reprogramming branched chain amino acid metabolism
Source: PubMed Central journal article supplement — Mol Ther. 2024 May 11;32(9):3128–44. doi: 10.1016/j.ymthe.2024.05.017 (PMC11403223; doi:10.1016/j.ymthe.2024.05.017), 2024-05-11
Supplement: mmc1.pdf [file mmc1.pdf]

## **Supplemental Information**

### **BCKDK modification enhances the anticancer efficacy of CAR-T cells by reprogramming branched chain amino acid metabolism**

**Quanjun Yang, Xinting Zhu, Ping Huang, Chunyan Li, Leng Han, Yonglong Han, Run Gan, Bo Xin, Yixing Tu, Shumin Zhou, Ting Yuan, Juan Hao, Chunqiong Li, Li Zhang, Lei Shi, and Cheng Guo**

## Supplemental Material

**Table S1 the concentrations of metabolites and inhibitors**

|            | Concentration | MW     | Formula                                                                       | References |
|------------|---------------|--------|-------------------------------------------------------------------------------|------------|
| Leucine    | 50 $\mu$ M    | 131.17 | C <sub>6</sub> H <sub>13</sub> NO <sub>2</sub>                                | 1-3        |
| Isoleucine | 50 $\mu$ M    | 131.17 | C <sub>6</sub> H <sub>13</sub> NO <sub>2</sub>                                | 4          |
| Valine     | 50 $\mu$ M    | 117.15 | C <sub>5</sub> H <sub>11</sub> NO <sub>2</sub>                                | 5          |
| BT2        | 50 $\mu$ M    | 247.1  | C <sub>9</sub> H <sub>4</sub> Cl <sub>2</sub> O <sub>2</sub> S                | 6          |
| BCH        | 100 $\mu$ M   | 155.19 | C <sub>8</sub> H <sub>13</sub> NO <sub>2</sub>                                | 7          |
| V9302      | 10 $\mu$ M    | 538.68 | C <sub>34</sub> H <sub>38</sub> N <sub>2</sub> O <sub>4</sub>                 | 8          |
| JPH203     | 5 $\mu$ M     | 472.32 | C <sub>23</sub> H <sub>19</sub> Cl <sub>2</sub> N <sub>3</sub> O <sub>4</sub> | 9          |

### References

- 1 Sinclair, L. V., Rolf, J., Emslie, E., Shi, Y. B., Taylor, P. M., & Cantrell, D. A. (2013). Control of amino-acid transport by antigen receptors coordinates the metabolic reprogramming essential for T cell differentiation. *Nature immunology*, 14(5), 500-508.
- 2 Wilkinson, D. J., Hossain, T., Hill, D. S., Phillips, B. E., Crossland, H., Williams, J., ... & Atherton, P. J. (2013). Effects of leucine and its metabolite  $\beta$  - hydroxy -  $\beta$  - methylbutyrate on human skeletal muscle protein metabolism. *The Journal of physiology*, 591(11), 2911-2923.
- 3 Fox, H. L., Pham, P. T., Kimball, S. R., Jefferson, L. S., & Lynch, C. J. (1998). Amino acid effects on translational repressor 4E-BP1 are mediated primarily by L-leucine in isolated adipocytes. *American Journal of Physiology-Cell Physiology*, 275(5), C1232-C1238.
- 4 Ma, E. H., Bantug, G., Griss, T., Condotta, S., Johnson, R. M., Samborska, B., ... & Jones, R. G. (2017). Serine is an essential metabolite for effector T cell expansion. *Cell metabolism*, 25(2), 345-357.
- 5 Kakazu, E., Kanno, N., Ueno, Y., & Shimosegawa, T. (2007). Extracellular branched-chain amino acids, especially valine, regulate maturation and function of monocyte-derived dendritic cells. *The Journal of Immunology*, 179(10), 7137-7146.
- 6 Yu, L., Huang, T., Zhao, J., Zhou, Z., Cao, Z., Chi, Y., ... & Wang, H. (2024). Branched-chain amino acid catabolic defect in vascular smooth muscle cells drives thoracic aortic dissection via mTOR hyperactivation. *Free Radical Biology and Medicine*, 210, 25-41.
- 7 Yoon, B. R., Oh, Y. J., Kang, S. W., & Lee, W. W. (2018). Role of SLC7A5 in metabolic reprogramming of human monocyte/macrophage immune responses. *Frontiers in immunology*, 9, 326146.
- 8 Wetzel, T. J., Erfan, S. C., Figueroa, L. D., Wheeler, L. M., & Ananieva, E. A. (2023). Crosstalk between arginine, glutamine, and the branched chain amino acid metabolism in the tumor microenvironment. *Frontiers in Oncology*, 13, 1186539.
- 9 Yin, Q., Brameld, J. M., Parr, T., & Murton, A. J. (2020). Leucine and mTORc1 act independently to regulate 2-deoxyglucose uptake in L6 myotubes. *Amino Acids*, 52, 477-486.

**Table S2. Datasets for metabolomics analysis**

| Sample                          | Bekdk_OE_CART_1 | Bekdk_OE_CART_2 | Bekdk_OE_CART_3 | CART_1  | CART_2  | CART_3  | Bekdk_KO_CART_1 | Bekdk_KO_CART_2 | Bekdk_KO_CART_3 |
|---------------------------------|-----------------|-----------------|-----------------|---------|---------|---------|-----------------|-----------------|-----------------|
| Group                           | Bekdk_OE_CART   | Bekdk_OE_CART   | Bekdk_OE_CART   | CART    | CART    | CART    | Bekdk_KO_CART   | Bekdk_KO_CART   | Bekdk_KO_CART   |
| 2_keto_isovalerate              | 4093            | 13510           | 20140           | 12270   | 9646    | 4599    | 2348            | 14983           | 7635            |
| 2_ketoisocaproate               | 527741          | 365442          | 204496          | 122931  | 114215  | 249335  | 139109          | 135300          | 217805          |
| 3_Hydroxy_Pyrroline_Carboxylate | 24136           | 12613           | 69454           | 53448   | 21735   | 6530    | 5687            | 9144            | 12973           |
| 3_methyl_2_oxopentanoate        | 106563          | 130130          | 185873          | 44737   | 74158   | 51445   | 26214           | 29686           | 14275           |
| 4_Amino_butiraldehyde           | 2927            | 3669            | 2863            | 1612    | 2405    | 1505    | 973             | 859             | 1439            |
| Alanine                         | 1600106         | 1171768         | 1792471         | 4442578 | 5213740 | 1125576 | 656742          | 166557          | 545255          |
| Aminobutyric_acid               | 9713            | 5583            | 9181            | 21820   | 18853   | 12146   | 5396            | 7109            | 8600            |
| Arginine                        | 119918          | 146077          | 1107532         | 1065531 | 835512  | 106906  | 56539           | 40648           | 51785           |
| Argininosuccinate               | 11175           | 13095           | 18290           | 8253    | 6486    | 9241    | 5014            | 6786            | 6548            |
| Asparagine                      | 765160          | 905343          | 1126281         | 2308087 | 1600376 | 1237315 | 210935          | 189429          | 160866          |
| Asparate                        | 447138          | 536867          | 709771          | 5938401 | 583988  | 1162024 | 2143724         | 213650          | 275043          |
| Carnosine                       | 51214           | 37933           | 45712           | 81668   | 71171   | 108840  | 9259            | 6926            | 11373           |
| Citrate                         | 310             | 1682            | 729             | 4242    | 773     | 13241   | 2513            | 2238            | 1979            |
| Citrulline                      | 40466           | 34733           | 41349           | 88945   | 69674   | 70894   | 22881           | 21252           | 21810           |
| Creatinine                      | 3630            | 663             | 3572            | 2821    | 3454    | 6939    | 3868            | 853             | 3314            |
| Cystathionine                   | 43620           | 46836           | 44862           | 33570   | 30237   | 34138   | 4637            | 17029           | 14536           |
| Cysteine                        | 2703            | 1740            | 3122            | 7774    | 6291    | 10025   | 1498            | 458             | 625             |
| Cystine                         | 3882            | 2427            | 1800            | 2321    | 6832    | 1491    | 567             | 1243            | 583             |
| Ethanolamine                    | 4394            | 4065            | 5333            | 3284    | 4491    | 2409    | 2541            | 1336            | 332             |
| Fumarate                        | 533372          | 333079          | 472489          | 634480  | 641047  | 870134  | 134580          | 253035          | 250448          |
| Glutamate                       | 12885011        | 20108919        | 16490585        | 7291063 | 5624385 | 5516692 | 8424968         | 7980211         | 7928470         |

|               |          |          |          |          |           |          |          |          |          |
|---------------|----------|----------|----------|----------|-----------|----------|----------|----------|----------|
| Glutamine     | 15165051 | 20287965 | 28552113 | 99899669 | 100914543 | 88121393 | 64704676 | 68645706 | 73340465 |
| Glycine       | 3761     | 3158     | 8706     | 7186     | 3279      | 3043     | 1309     | 762      | 4399     |
| Glyoxylate    | 2967     | 1150     | 1572     | 3910     | 1997      | 3593     | 4435     | 439      | 2070     |
| Guanine       | 2978     | 2998     | 8972     | 3608     | 1603      | 6554     | 756      | 976      | 1171     |
| Histidine     | 1774726  | 2157686  | 1852008  | 6997196  | 6239402   | 5117271  | 246973   | 283423   | 361913   |
| Homocystine   | 637      | 5058     | 976      | 1838     | 1334      | 1410     | 1012     | 1383     | 1251     |
| Hydroxylysine | 1493     | 404      | 616      | 3878     | 1327      | 371      | 2249     | 612      | 1836     |
| Indole        | 286      | 242      | 138      | 586      | 678       | 665      | 273      | 234      | 95       |
| Isoleucine    | 1424886  | 1002924  | 1531933  | 841661   | 699141    | 704233   | 151188   | 142454   | 286614   |
| Lactate       | 1500     | 1314     | 2084     | 517      | 1248      | 227      | 371      | 145      | 227      |
| Leucine       | 2035183  | 1358424  | 2827868  | 1005679  | 1204579   | 1167622  | 323317   | 358875   | 403759   |
| Lysine        | 3123     | 279      | 1251     | 1603     | 3353      | 1871     | 1035     | 576      | 956      |
| Malate        | 72512    | 24833    | 25297    | 71908    | 27319     | 23421    | 75213    | 13581    | 4591     |
| Methionine    | 21907    | 144275   | 49468    | 136591   | 88666     | 331743   | 49380    | 61853    | 134782   |
| Ornithine     | 136610   | 93108    | 91492    | 691582   | 221449    | 276700   | 141477   | 27658    | 107397   |
| Phenylalanine | 170147   | 170510   | 232366   | 78325    | 174378    | 588101   | 248480   | 219760   | 446170   |
| Proline       | 34100768 | 37693277 | 39360733 | 16582537 | 18541617  | 1058442  | 6350716  | 5878622  | 6584499  |
| Pyruvate      | 6110     | 1177     | 3781     | 2359     | 2301      | 4036     | 1786     | 186      | 623      |
| Sarcosine     | 1240164  | 1356958  | 1428437  | 4330780  | 3813938   | 2992482  | 1735847  | 2831756  | 1173559  |
| Spermidine    | 2208     | 3642     | 690      | 955      | 1569      | 240      | 420      | 624      | 712      |
| Spermine      | 3903     | 1588     | 8370     | 2735     | 2466      | 1113     | 1938     | 2649     | 741      |
| Succinate     | 5720     | 24452    | 13644    | 2639     | 5507      | 13229    | 5036     | 1293     | 5519     |
| Taurine       | 3069032  | 272864   | 3475404  | 2271978  | 1762637   | 1848679  | 1060629  | 1302384  | 991703   |
| Threonine     | 62       | 1192     | 1826     | 235      | 211       | 1146     | 188      | 459      | 239      |
| Tryptophan    | 26575    | 45058    | 27759    | 10617    | 24298     | 29875    | 1890     | 12729    | 3942     |

---

|          |        |        |        |        |        |        |        |       |        |
|----------|--------|--------|--------|--------|--------|--------|--------|-------|--------|
| Tyrosine | 58469  | 64557  | 265332 | 106502 | 146892 | 148178 | 68647  | 3774  | 55225  |
| Valine   | 489710 | 528147 | 470219 | 343401 | 215836 | 263498 | 118152 | 70920 | 122465 |

---

**Table S3 The variable importance in projection from Partial Least Squares - Discriminant Analysis**

|                   | Comp. 1 | Comp. 2 | Comp. 3 | Comp. 4 | Comp. 5 | Comp. 6 | Comp. 7 | Comp. 8 |
|-------------------|---------|---------|---------|---------|---------|---------|---------|---------|
| Histidine         | 2.0739  | 1.9123  | 1.8918  | 1.8889  | 1.8882  | 1.8881  | 1.8881  | 1.8881  |
| Citrulline        | 1.9945  | 1.8293  | 1.807   | 1.8047  | 1.804   | 1.8039  | 1.8039  | 1.8039  |
| Cysteine          | 1.9239  | 1.7653  | 1.7452  | 1.7425  | 1.742   | 1.7419  | 1.7419  | 1.7419  |
| Asparagine        | 1.9206  | 1.7593  | 1.7395  | 1.7369  | 1.7363  | 1.7362  | 1.7362  | 1.7362  |
| Carnosine         | 1.8912  | 1.7316  | 1.7104  | 1.7079  | 1.7073  | 1.7072  | 1.7072  | 1.7072  |
| Alanine           | 1.6451  | 1.5064  | 1.4883  | 1.49    | 1.4895  | 1.4894  | 1.4894  | 1.4894  |
| Fumarate          | 1.5441  | 1.4142  | 1.3969  | 1.3964  | 1.3959  | 1.3958  | 1.3958  | 1.3958  |
| Aminobutyric_acid | 1.4828  | 1.3748  | 1.36    | 1.358   | 1.3581  | 1.358   | 1.358   | 1.358   |
| Arginine          | 1.4283  | 1.308   | 1.2977  | 1.2983  | 1.298   | 1.2979  | 1.2979  | 1.2979  |
| Ornithine         | 1.409   | 1.2966  | 1.2936  | 1.2916  | 1.2913  | 1.2913  | 1.2913  | 1.2913  |
| Indole            | 1.3737  | 1.3035  | 1.2906  | 1.29    | 1.2896  | 1.2897  | 1.2897  | 1.2897  |
| Cystine           | 1.1541  | 1.0632  | 1.0614  | 1.0604  | 1.06    | 1.0601  | 1.0601  | 1.0601  |
| Glutamate         | 1.065   | 1.2384  | 1.2239  | 1.2233  | 1.2228  | 1.2228  | 1.2228  | 1.2228  |
| Phenylalanine     | 1.0529  | 0.99218 | 0.98319 | 0.98199 | 0.98413 | 0.98406 | 0.98406 | 0.98406 |
| Tyrosine          | 1.0516  | 0.98708 | 0.97536 | 0.97963 | 0.98043 | 0.98039 | 0.98039 | 0.98039 |
| Isoleucine        | 1.0296  | 1.0486  | 1.0378  | 1.0363  | 1.0359  | 1.0359  | 1.0359  | 1.0359  |
| Pyruvate          | 0.99457 | 1.0315  | 1.0362  | 1.0347  | 1.0346  | 1.0345  | 1.0345  | 1.0345  |
| Guanine           | 0.93564 | 0.92336 | 0.91204 | 0.91541 | 0.91509 | 0.91508 | 0.91508 | 0.91508 |
| Tryptophan        | 0.92439 | 0.86051 | 0.8771  | 0.87777 | 0.87755 | 0.87752 | 0.87752 | 0.87752 |
| Cystathionine     | 0.89789 | 0.86523 | 0.87229 | 0.87337 | 0.87319 | 0.87316 | 0.87316 | 0.87316 |
| Leucine           | 0.85114 | 0.93847 | 0.92893 | 0.92768 | 0.92739 | 0.92732 | 0.92732 | 0.92732 |
| Ethanolamine      | 0.79318 | 0.8247  | 0.81451 | 0.81368 | 0.81347 | 0.81386 | 0.81387 | 0.81387 |

|                                 |          |          |         |         |         |         |         |         |
|---------------------------------|----------|----------|---------|---------|---------|---------|---------|---------|
| Sarcosine                       | 0.78375  | 0.95965  | 0.94858 | 0.95095 | 0.95083 | 0.95101 | 0.95101 | 0.95101 |
| Asparate                        | 0.73087  | 0.66954  | 0.70352 | 0.70487 | 0.70517 | 0.70519 | 0.7052  | 0.7052  |
| Valine                          | 0.70023  | 0.85463  | 0.84473 | 0.84416 | 0.84386 | 0.84387 | 0.84387 | 0.84387 |
| Lysine                          | 0.67831  | 0.66293  | 0.70334 | 0.70405 | 0.70394 | 0.70399 | 0.70399 | 0.70399 |
| Glycine                         | 0.67196  | 0.73063  | 0.7218  | 0.72178 | 0.72174 | 0.72226 | 0.72226 | 0.72226 |
| 2_ketoisocaproate               | 0.63761  | 0.91498  | 0.90578 | 0.90834 | 0.90806 | 0.90809 | 0.90809 | 0.90809 |
| Hydroxylysine                   | 0.62231  | 0.61463  | 0.66201 | 0.66263 | 0.66479 | 0.66491 | 0.66491 | 0.66491 |
| 3_methyl_2_oxopentanoate        | 0.52116  | 0.71191  | 0.71238 | 0.7116  | 0.71151 | 0.71162 | 0.71162 | 0.71162 |
| 3_Hydroxy_Pyrroline_Carboxylate | 0.43686  | 0.5711   | 0.56611 | 0.56554 | 0.56832 | 0.56834 | 0.56834 | 0.56834 |
| Methionine                      | 0.43202  | 0.67036  | 0.67623 | 0.67673 | 0.67724 | 0.67764 | 0.67764 | 0.67764 |
| Lactate                         | 0.37364  | 0.68754  | 0.68582 | 0.68931 | 0.68917 | 0.68918 | 0.68918 | 0.68918 |
| Malate                          | 0.33951  | 0.53771  | 0.58931 | 0.59293 | 0.59309 | 0.59322 | 0.59322 | 0.59322 |
| Homocystine                     | 0.32692  | 0.31926  | 0.41704 | 0.41918 | 0.41904 | 0.41924 | 0.41924 | 0.41924 |
| Argininosuccinate               | 0.30353  | 0.74568  | 0.73845 | 0.74239 | 0.74212 | 0.74208 | 0.74208 | 0.74208 |
| Glyoxylate                      | 0.28887  | 0.42114  | 0.53613 | 0.5354  | 0.53548 | 0.53568 | 0.53567 | 0.53567 |
| 2_keto_isovalerate              | 0.26806  | 0.24758  | 0.40188 | 0.40216 | 0.40368 | 0.40365 | 0.40365 | 0.40365 |
| Spermine                        | 0.2552   | 0.68126  | 0.6756  | 0.67593 | 0.67613 | 0.67651 | 0.67652 | 0.67652 |
| Proline                         | 0.25504  | 0.62188  | 0.62795 | 0.62975 | 0.63039 | 0.63034 | 0.63034 | 0.63034 |
| Creatinine                      | 0.22804  | 0.35     | 0.47511 | 0.47527 | 0.47702 | 0.47699 | 0.47699 | 0.47699 |
| Spermidine                      | 0.2183   | 0.45162  | 0.4839  | 0.48474 | 0.4851  | 0.48507 | 0.48509 | 0.48509 |
| Taurine                         | 0.16904  | 0.44501  | 0.52132 | 0.52267 | 0.52288 | 0.52296 | 0.52296 | 0.52296 |
| 4_Amino_butyaldehyde            | 0.16326  | 0.6166   | 0.62519 | 0.62498 | 0.62499 | 0.62496 | 0.62496 | 0.62496 |
| Glutamine                       | 0.15097  | 0.69511  | 0.6905  | 0.68992 | 0.68978 | 0.68973 | 0.68973 | 0.68973 |
| Succinate                       | 0.12722  | 0.4147   | 0.42358 | 0.42386 | 0.4289  | 0.42893 | 0.42893 | 0.42893 |
| Threonine                       | 0.076865 | 0.074334 | 0.22316 | 0.23102 | 0.23437 | 0.23436 | 0.23441 | 0.23441 |

---

|         |          |        |         |         |         |         |         |         |
|---------|----------|--------|---------|---------|---------|---------|---------|---------|
| Citrate | 0.022241 | 0.4503 | 0.45307 | 0.47105 | 0.47102 | 0.47126 | 0.47127 | 0.47126 |
|---------|----------|--------|---------|---------|---------|---------|---------|---------|

---



**Table S4. Figure 1C raw data**

|           | Control |       |       |       |       | Valine     |       |       |       |       |
|-----------|---------|-------|-------|-------|-------|------------|-------|-------|-------|-------|
| E:T(1:1)  | 70.98   | 73.78 | 81.89 | 79.99 | 72.44 | 82.74      | 90.73 | 82.27 | 84.08 | 80.37 |
| E:T(1:2)  | 30.24   | 50.91 | 45.73 | 46    | 35.18 | 68.93      | 62.47 | 62.07 | 60.17 | 54.67 |
| E:T(1:4)  | 28.01   | 33.74 | 25.71 | 24.58 | 28.47 | 37.71      | 50.23 | 49.6  | 36.32 | 38.12 |
| E:T(1:10) | 18.27   | 25.62 | 13.83 | 17.07 | 10.14 | 29.23      | 31.2  | 40.11 | 27.38 | 27.76 |
|           | Control |       |       |       |       | Isoleucine |       |       |       |       |
| E:T(1:1)  | 70.39   | 72.89 | 69.99 | 77.15 | 72.87 | 89.88      | 80.61 | 74.97 | 86.94 | 82.47 |
| E:T(1:2)  | 49.24   | 55.28 | 40.96 | 48.32 | 52.55 | 53.53      | 67.16 | 55.41 | 61.11 | 66.95 |
| E:T(1:4)  | 27.87   | 23.58 | 37.43 | 33.68 | 29.94 | 45.18      | 44.31 | 44.69 | 37.89 | 48.7  |
| E:T(1:10) | 20.24   | 15.2  | 15.2  | 16.43 | 9.99  | 22.4       | 23.34 | 25.22 | 24.6  | 37.88 |
|           | Control |       |       |       |       | Leucine    |       |       |       |       |
| E:T(1:1)  | 72.82   | 72.86 | 74.05 | 73.82 | 70.72 | 85.38      | 83.36 | 87.1  | 87    | 88.83 |
| E:T(1:2)  | 36.54   | 48.47 | 43.22 | 44.75 | 39.34 | 78.24      | 77.63 | 69.96 | 76.41 | 80.77 |
| E:T(1:4)  | 30.42   | 30    | 23.5  | 22.92 | 29.9  | 54.94      | 55.79 | 60.57 | 58.16 | 62.55 |
| E:T(1:10) | 23.98   | 20.18 | 14.88 | 16.95 | 15.62 | 48.27      | 45.9  | 39.55 | 45.13 | 48.01 |
|           | Control |       |       |       |       | BT2        |       |       |       |       |
| E:T(1:1)  | 72.9    | 72.4  | 77.24 | 76.49 | 72.73 | 53.68      | 55.69 | 53.73 | 67.25 | 55.37 |
| E:T(1:2)  | 45.41   | 47.93 | 44.58 | 43.72 | 60.46 | 36.07      | 26.39 | 48.87 | 31.18 | 34.41 |
| E:T(1:4)  | 31.27   | 30.82 | 41.69 | 23.54 | 29.89 | 19.54      | 8.29  | 17.58 | 8.82  | 27.01 |
| E:T(1:10) | 23.84   | 22.56 | 14.28 | 16.44 | 18.78 | 13.19      | 10.45 | 10.68 | 11.15 | 11.99 |
|           | Control |       |       |       |       | BCH        |       |       |       |       |
| E:T(1:1)  | 74.43   | 73.75 | 81.37 | 79.2  | 76.7  | 54.88      | 45.56 | 54.95 | 47.99 | 59.25 |
| E:T(1:2)  | 43.69   | 53.36 | 46.77 | 49.02 | 47.98 | 40.92      | 42.11 | 32.02 | 36.3  | 48.9  |
| E:T(1:4)  | 39.49   | 33.76 | 27.08 | 27.01 | 34.58 | 20.86      | 17.16 | 19.12 | 20.49 | 19.03 |
| E:T(1:10) | 25.92   | 23.2  | 17.05 | 19.57 | 18.16 | 9.51       | 8.39  | 10.01 | 6.2   | 6.52  |
|           | Control |       |       |       |       | V9302      |       |       |       |       |
| E:T(1:1)  | 73.87   | 76.52 | 82.66 | 82.13 | 76.15 | 49.94      | 52.57 | 50.46 | 54.54 | 64.8  |
| E:T(1:2)  | 53.33   | 52.84 | 46.59 | 51.79 | 47.53 | 38.1       | 46.97 | 38.65 | 42.12 | 37.29 |
| E:T(1:4)  | 37.43   | 31.45 | 36.94 | 39.53 | 34.76 | 26.4       | 26.62 | 16.67 | 15.38 | 20.23 |
| E:T(1:10) | 18.5    | 26.8  | 17.06 | 24.95 | 24.61 | 11.3       | 6.03  | 12.55 | 8.2   | 14.05 |
|           | Control |       |       |       |       | JPH203     |       |       |       |       |
| E:T(1:1)  | 76.28   | 76.01 | 80.77 | 75.16 | 73.29 | 54.45      | 52.74 | 54.57 | 46.51 | 50.42 |
| E:T(1:2)  | 60.93   | 49.33 | 52.93 | 50.85 | 51.65 | 38.83      | 36.16 | 43.63 | 42.79 | 44.97 |
| E:T(1:4)  | 35.43   | 30.93 | 28.11 | 33.13 | 36.36 | 32.21      | 26.34 | 22.87 | 17.57 | 27.16 |
| E:T(1:10) | 22.41   | 22.82 | 17.46 | 14.94 | 17.82 | 18.56      | 7.96  | 13.5  | 2.51  | 16.55 |

**Table S5. Figure 1E raw data**

|            | E:T(1:1) | E:T(1:2) | E:T(1:4) | E:T(1:10) |
|------------|----------|----------|----------|-----------|
| Control    | 0.49     | 14.6     | 33.5     | 61.5      |
|            | 0.34     | 14.9     | 31.8     | 62.4      |
|            | 0.36     | 15.7     | 32.6     | 61.7      |
| Leucine    | 0.27     | 5.06     | 22.5     | 48.9      |
|            | 0.24     | 5.27     | 21.6     | 49.7      |
|            | 0.18     | 6.04     | 23.2     | 50.4      |
| Isoleucine | 0.32     | 7.82     | 26.6     | 50.8      |
|            | 0.37     | 7.56     | 26.4     | 51.3      |
|            | 0.34     | 7.31     | 25.3     | 50.2      |
| Valine     | 0.27     | 10.8     | 26.7     | 58.6      |
|            | 0.34     | 11.25    | 27.6     | 56.7      |
|            | 0.36     | 10.94    | 28.5     | 57.3      |
| BT2        | 0.74     | 22.7     | 28.5     | 75.7      |
|            | 0.88     | 22.9     | 29.4     | 76.4      |
|            | 0.82     | 23.7     | 28.9     | 77.8      |
| BCH        | 0.68     | 18.9     | 30.6     | 70.2      |
|            | 0.72     | 17.8     | 31.7     | 70.5      |
|            | 0.75     | 18.3     | 30.4     | 73.5      |
| V9302      | 0.76     | 24.7     | 30.5     | 82.8      |
|            | 0.79     | 24.9     | 30.7     | 89.7      |
|            | 0.82     | 25.7     | 31.5     | 90.2      |
| JPH203     | 0.86     | 19.2     | 27.9     | 83.5      |
|            | 0.89     | 21.3     | 26.7     | 84.2      |
|            | 0.94     | 19.7     | 29.3     | 84.9      |

**Table S6. Figure 1F raw data**

|            | E:T(1:1) | E:T(1:2) | E:T(1:4) | E:T(1:10) |
|------------|----------|----------|----------|-----------|
| Control    | 65.2     | 48       | 19.3     | 10.4      |
|            | 64.2     | 44.7     | 19.2     | 9.58      |
|            | 64.9     | 45.7     | 13.8     | 10.1      |
| Leucine    | 69.5     | 41.9     | 27       | 18.2      |
|            | 68.4     | 41.3     | 27.4     | 18.6      |
|            | 70.3     | 42.4     | 28.6     | 17.4      |
| Isoleucine | 75.5     | 44.6     | 28.9     | 19.4      |
|            | 73.8     | 43.7     | 27.6     | 19.7      |
|            | 72.9     | 45.1     | 28.8     | 18.6      |
| Valine     | 73.1     | 41.6     | 26.5     | 7.35      |
|            | 72.8     | 42.7     | 27.4     | 7.16      |
|            | 74.9     | 41.9     | 26.9     | 6.89      |
| BT2        | 55.8     | 39.6     | 13.8     | 4.69      |
|            | 53.7     | 40.5     | 13.4     | 5.17      |
|            | 55.2     | 39.1     | 14.9     | 5.49      |
| BCH        | 72.5     | 42.6     | 17.3     | 9.57      |
|            | 71.6     | 41.8     | 17.2     | 8.97      |
|            | 70.2     | 43.6     | 16.4     | 9.64      |
| V9302      | 63.3     | 38.9     | 15.5     | 6.19      |
|            | 61.4     | 39.2     | 14.8     | 6.87      |
|            | 60.7     | 37.4     | 15.9     | 6.28      |
| JPH203     | 68.8     | 46       | 17.7     | 5.11      |
|            | 64.9     | 41.7     | 17.9     | 4.38      |
|            | 66.7     | 45.2     | 17.3     | 5.07      |

**Table S7. Figure 2B raw data**

| TNF-alpha |         |            |        |      |      |       |        |
|-----------|---------|------------|--------|------|------|-------|--------|
| Control   | Leucine | Isoleucine | Valine | BT2  | BCH  | V9302 | JPH203 |
| 14.7      | 18.7    | 16.5       | 17     | 10.4 | 11.2 | 10.9  | 12.3   |
| 14.8      | 19.2    | 15.9       | 16.5   | 9.87 | 11.7 | 10.4  | 12.6   |
| 14.1      | 18.3    | 15.5       | 16.1   | 10.1 | 11.1 | 9.8   | 10.7   |

  

| IFN-gamma |         |            |        |      |      |       |        |
|-----------|---------|------------|--------|------|------|-------|--------|
| Control   | Leucine | Isoleucine | Valine | BT2  | BCH  | V9302 | JPH203 |
| 10.7      | 15.5    | 12.2       | 14.6   | 7.73 | 9.73 | 9.11  | 8.23   |
| 10.1      | 15.6    | 12.8       | 14.2   | 7.16 | 9.57 | 9.34  | 8.19   |
| 9.87      | 14.9    | 12.4       | 13.8   | 7.46 | 9.42 | 8.94  | 7.94   |

**Table S8. Figure 2E raw data**

| CSFE+   |         |            |        |      |      |       |        |
|---------|---------|------------|--------|------|------|-------|--------|
| Control | Leucine | Isoleucine | Valine | BT2  | BCH  | V9302 | JPH203 |
| 51.5    | 89.4    | 73.8       | 77.1   | 33.5 | 43.4 | 40.3  | 30.6   |
| 52.4    | 87.9    | 76.4       | 76.5   | 34.2 | 44.3 | 40.9  | 32.7   |
| 50.7    | 90.3    | 75.2       | 76.9   | 33.8 | 44.9 | 41.2  | 32.9   |

**Table S9. Figure 2G raw data**

| 2-NBDG  |         |            |        |      |      |       |        |
|---------|---------|------------|--------|------|------|-------|--------|
| Control | Leucine | Isoleucine | Valine | BT2  | BCH  | V9302 | JPH203 |
| 62.2    | 83.6    | 81.5       | 87.9   | 55.7 | 47.2 | 44.6  | 55.8   |
| 60.4    | 82.9    | 80.2       | 89.4   | 54.8 | 46.8 | 45.1  | 54.8   |
| 61.7    | 84.7    | 81.4       | 86.4   | 58.7 | 45.9 | 44.3  | 53.7   |

**Table S10. Figure 3B raw data**

| Mock T | CAR-T | BCKDK-KO CAR-T | BCKDK-OE CAR-T |
|--------|-------|----------------|----------------|
| 0      | 93.4  | 94.8           | 96.3           |
| 0      | 93.1  | 93.6           | 95.7           |
| 0      | 92.7  | 94.5           | 96.8           |

**Table S11. Figure 3C raw data**

| Mock T | CAR-T | BCKDK-KO CAR-T | BCKDK-OE CAR-T |
|--------|-------|----------------|----------------|
| 0.97   | 1.06  | 0.72           | 2.32           |
| 0.92   | 1.09  | 0.76           | 2.16           |
| 1.08   | 1.04  | 0.71           | 2.17           |



**Table S12. Figure 3F raw data**

| CAR-T | BCKDK-KO CAR-T | BCKDK-OE CAR-T |
|-------|----------------|----------------|
| 80.5  | 66.7           | 89             |
| 81.2  | 65.9           | 89.2           |
| 80.3  | 66.8           | 87.3           |

**Table S13. Figure 3G raw data**

| CAR-T | BCKDK-KO CAR-T | BCKDK-OE CAR-T |
|-------|----------------|----------------|
| 61.8  | 47.9           | 73.9           |
| 62.3  | 48.3           | 73.1           |
| 61.1  | 47.1           | 72.7           |

**Table S14. Figure 3H raw data**

|                | E:T(1:1) | E:T(1:2) | E:T(1:4) | E:T(1:10) |
|----------------|----------|----------|----------|-----------|
| CAR-T          | 88.55    | 73.75    | 47.24    | 29.69     |
|                | 87.38    | 74.6     | 41.88    | 30.32     |
|                | 90.11    | 73.33    | 46.52    | 28.21     |
|                | 87.79    | 74.24    | 48.55    | 29.34     |
|                | 89.43    | 73.11    | 49.23    | 29.43     |
| BCKDK-KO CAR-T | 81.2     | 69.92    | 36.03    | 17.17     |
|                | 79.41    | 71.41    | 31.46    | 16.6      |
|                | 81.24    | 66.4     | 30.46    | 7.18      |
|                | 80.77    | 62.29    | 35.94    | 4.76      |
|                | 76.63    | 70.05    | 37.86    | 10.65     |
| BCKDK-OE CAR-T | 91.22    | 86.02    | 51.16    | 38.05     |
|                | 93.49    | 82.89    | 53.49    | 47.49     |
|                | 94.9     | 78.76    | 53.03    | 45.09     |
|                | 92.98    | 81.62    | 54.75    | 36.33     |
|                | 94.3     | 80.8     | 53.97    | 43.56     |

**Table S15. Figure 3I raw data**

| IFN-gamma+ cells(%) |                |                |
|---------------------|----------------|----------------|
| CAR-T               | BCKDK-KO CAR-T | BCKDK-OE CAR-T |
| 15.6                | 9.14           | 22.1           |
| 15.1                | 9.67           | 20.8           |
| 14.8                | 9.27           | 21.7           |

  

| TNF-alpha+ cells(%) |                |                |
|---------------------|----------------|----------------|
| CAR-T               | BCKDK-KO CAR-T | BCKDK-OE CAR-T |
| 12.4                | 4.59           | 15.8           |
| 11.7                | 5.17           | 15.7           |
| 12.6                | 4.97           | 13.7           |

**Table S16. Figure 4B raw data**

| NALM6-GL cells ( % ) |       |      |      |                |      |      |                |      |      |
|----------------------|-------|------|------|----------------|------|------|----------------|------|------|
|                      | CAR-T |      |      | BCKDK-KO CAR-T |      |      | BCKDK-OE CAR-T |      |      |
| E:T(1:1)             | 18.4  | 18.6 | 19.2 | 24.2           | 23.1 | 24.2 | 3.7            | 3.48 | 4.07 |
| E:T(1:2)             | 24.2  | 24.9 | 25.1 | 30.4           | 30.8 | 29.6 | 15.1           | 14.7 | 15.8 |
| E:T(1:4)             | 32.7  | 32.3 | 33.4 | 46.4           | 47.3 | 47.1 | 30.5           | 30.1 | 31.4 |
| E:T(1:10)            | 80.9  | 80.2 | 81.3 | 84.2           | 85.4 | 85.1 | 78.1           | 78   | 77.6 |

  

| CAR-T cells ( % ) |       |      |      |                |      |      |                |      |      |
|-------------------|-------|------|------|----------------|------|------|----------------|------|------|
|                   | CAR-T |      |      | BCKDK-KO CAR-T |      |      | BCKDK-OE CAR-T |      |      |
| E:T(1:1)          | 64.4  | 65.1 | 66.3 | 56             | 54.6 | 53.8 | 85.8           | 82.6 | 80.9 |
| E:T(1:2)          | 50.3  | 51.2 | 53.4 | 53.2           | 51.2 | 54.3 | 56             | 57.2 | 54.7 |
| E:T(1:4)          | 37.3  | 37.4 | 38.2 | 17.4           | 14.8 | 15.7 | 44.1           | 43.5 | 42.9 |
| E:T(1:10)         | 6.25  | 6.59 | 6.74 | 1.74           | 1.27 | 1.56 | 7.79           | 8.54 | 7.94 |

**Table S17. Figure 4D raw data**

| NALM6 apoptosis |                |                |
|-----------------|----------------|----------------|
| CAR-T           | BCKDK-KO CAR-T | BCKDK-OE CAR-T |
| 62.8            | 8.84           | 86.2           |
| 61.4            | 8.94           | 84.3           |
| 60.3            | 9.37           | 85.7           |

  

| CAR-T apoptosis |                |                |
|-----------------|----------------|----------------|
| CAR-T           | BCKDK-KO CAR-T | BCKDK-OE CAR-T |
| 33.2            | 46.8           | 27.9           |
| 35.4            | 46.1           | 27.2           |
| 32.9            | 45.3           | 26.5           |

**Table S18. Figure 4F raw data**

| PD-1+ cells ( % ) |                |                |
|-------------------|----------------|----------------|
| CAR-T             | BCKDK-KO CAR-T | BCKDK-OE CAR-T |
| 25.6              | 30.6           | 6.34           |
| 24.8              | 30.1           | 6.48           |
| 25.7              | 28.9           | 7.12           |

  

| LAG-3-1+ cells ( % ) |                |                |
|----------------------|----------------|----------------|
| CAR-T                | BCKDK-KO CAR-T | BCKDK-OE CAR-T |
| 4.66                 | 6.21           | 2.59           |
| 4.6                  | 6.48           | 2.67           |
| 4.52                 | 6.57           | 2.41           |

**Table S19. Figure 5D raw data**

| p-mTOR/mTOR     |                |                |
|-----------------|----------------|----------------|
| CAR-T           | BCKDK-KO CAR-T | BCKDK-OE CAR-T |
| 0.94            | 0.39           | 1.26           |
| 0.97            | 0.42           | 1.29           |
| 1.08            | 0.47           | 1.34           |
| p-p70s6k/p70s6k |                |                |
| CAR-T           | BCKDK-KO CAR-T | BCKDK-OE CAR-T |
| 1.04            | 0.43           | 1.55           |
| 0.93            | 0.49           | 1.51           |
| 1.02            | 0.38           | 1.59           |
| p-4EBP1/4EBP1   |                |                |
| CAR-T           | BCKDK-KO CAR-T | BCKDK-OE CAR-T |
| 0.97            | 0.87           | 1.98           |
| 1.07            | 0.83           | 2.11           |
| 0.96            | 0.79           | 2.16           |



**Table S20. Figure 5F raw data**

|       | CAR-T |       |       | BCKDK-KO CAR-T |       |       | BCKDK-OE CAR-T |       |       |
|-------|-------|-------|-------|----------------|-------|-------|----------------|-------|-------|
| Tscm  | 7.47  | 7.89  | 7.68  | 1.97           | 1.78  | 2.02  | 16.3           | 17.5  | 16.4  |
| Tem   | 22    | 20.93 | 19.75 | 23.7           | 21.41 | 23.39 | 27.7           | 27.76 | 27.11 |
| Tem   | 64.9  | 65.4  | 67.2  | 67.3           | 69.8  | 68.1  | 50.1           | 48.5  | 50.48 |
| Temra | 5.71  | 5.78  | 5.37  | 6.97           | 7.01  | 6.49  | 5.92           | 6.24  | 6.01  |

**Table S21. Figure 6B raw data**

| DPI | Mock T | CAR-T | BCKDK-KO CAR-T | BCKDK-OE CAR-T |
|-----|--------|-------|----------------|----------------|
| 18  | 1      |       |                |                |
| 20  |        |       | 1              |                |
| 21  | 1      |       |                |                |
| 23  |        |       | 1              |                |
| 24  | 1      |       |                |                |
| 25  | 1      |       | 1              |                |
| 26  | 1      |       |                |                |
| 27  |        |       | 1              |                |
| 28  |        | 1     |                |                |
| 29  | 1      |       | 1              |                |
| 29  | 1      |       |                |                |
| 30  |        | 1     |                |                |
| 31  |        |       |                | 1              |
| 32  |        |       | 1              |                |
| 34  | 1      |       |                |                |
| 35  |        | 1     |                |                |
| 35  |        |       | 1              |                |
| 36  | 1      |       |                |                |
| 38  |        | 1     |                |                |
| 39  |        |       |                |                |
| 40  |        |       | 1              |                |
| 41  |        | 1     |                | 1              |
| 42  | 1      |       |                |                |
| 43  |        |       | 1              | 1              |
| 44  |        | 1     |                |                |
| 46  |        | 1     |                |                |
| 47  |        | 1     | 1              | 1              |
| 49  |        |       |                |                |
| 50  |        | 1     |                | 1              |
| 51  |        |       |                | 1              |
| 53  |        | 1     |                |                |
| 56  |        |       |                | 1              |
| 59  |        |       |                | 0              |
| 59  |        |       |                | 0              |
| 59  |        |       |                | 0              |

**Table S22. Figure 6D raw data**

| NALM6-GL cells ( % ) |       |                |                |
|----------------------|-------|----------------|----------------|
| Mock T               | CAR-T | BCKDK-KO CAR-T | BCKDK-OE CAR-T |
| 4.57                 | 0.42  | 0.61           | 0.27           |
| 4.72                 | 0.39  | 0.72           | 0.21           |
| 4.49                 | 0.46  | 0.84           | 0.24           |
| 4.38                 | 0.57  | 0.67           | 0.16           |
| 4.89                 | 0.46  | 0.82           | 0.24           |

  

| CAR-T cells ( % ) |       |                |                |
|-------------------|-------|----------------|----------------|
| Mock T            | CAR-T | BCKDK-KO CAR-T | BCKDK-OE CAR-T |
| 0                 | 3.01  | 1.55           | 5.54           |
| 0                 | 3.24  | 1.72           | 5.48           |
| 0                 | 2.98  | 1.49           | 5.96           |
| 0                 | 3.27  | 1.67           | 5.72           |
| 0                 | 3.06  | 1.48           | 5.39           |

**Table S23. Figure 6E raw data**

| Serum IFN- $\gamma$ (pg/mL) |       |                |                |
|-----------------------------|-------|----------------|----------------|
| Mock T                      | CAR-T | BCKDK-KO CAR-T | BCKDK-OE CAR-T |
| 24.3                        | 63.45 | 42.36          | 143.4          |
| 20.56                       | 64.25 | 38.59          | 127.66         |
| 27.45                       | 60.28 | 36.87          | 131.24         |
| 19.46                       | 58.79 | 39.57          | 147.82         |
| 23.54                       | 63.57 | 44.69          | 136.48         |

  

| Serum TNF- $\alpha$ (pg/mL) |       |                |                |
|-----------------------------|-------|----------------|----------------|
| Mock T                      | CAR-T | BCKDK-KO CAR-T | BCKDK-OE CAR-T |
| 14.35                       | 27.89 | 19.54          | 37.58          |
| 13.05                       | 26.89 | 18.59          | 42.56          |
| 15.24                       | 30.25 | 20.35          | 41.28          |
| 11.68                       | 27.84 | 20.64          | 39.57          |
| 12.64                       | 26.54 | 19.76          | 39.46          |

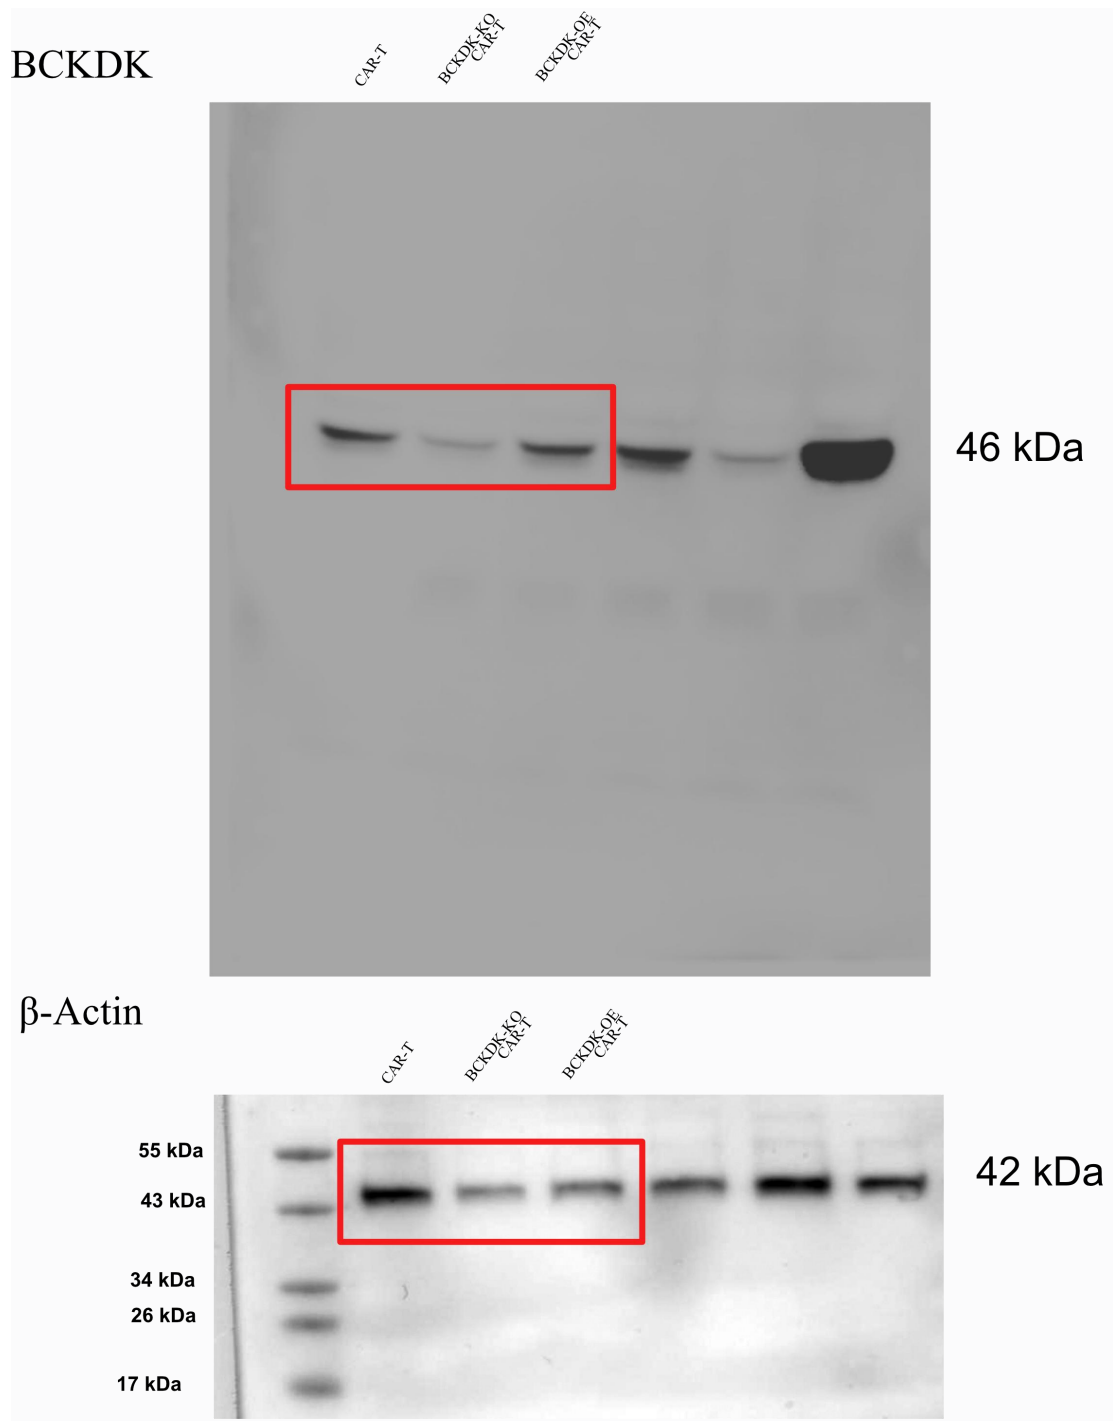

**Figure S1** The original, unaltered images of Figure 3E

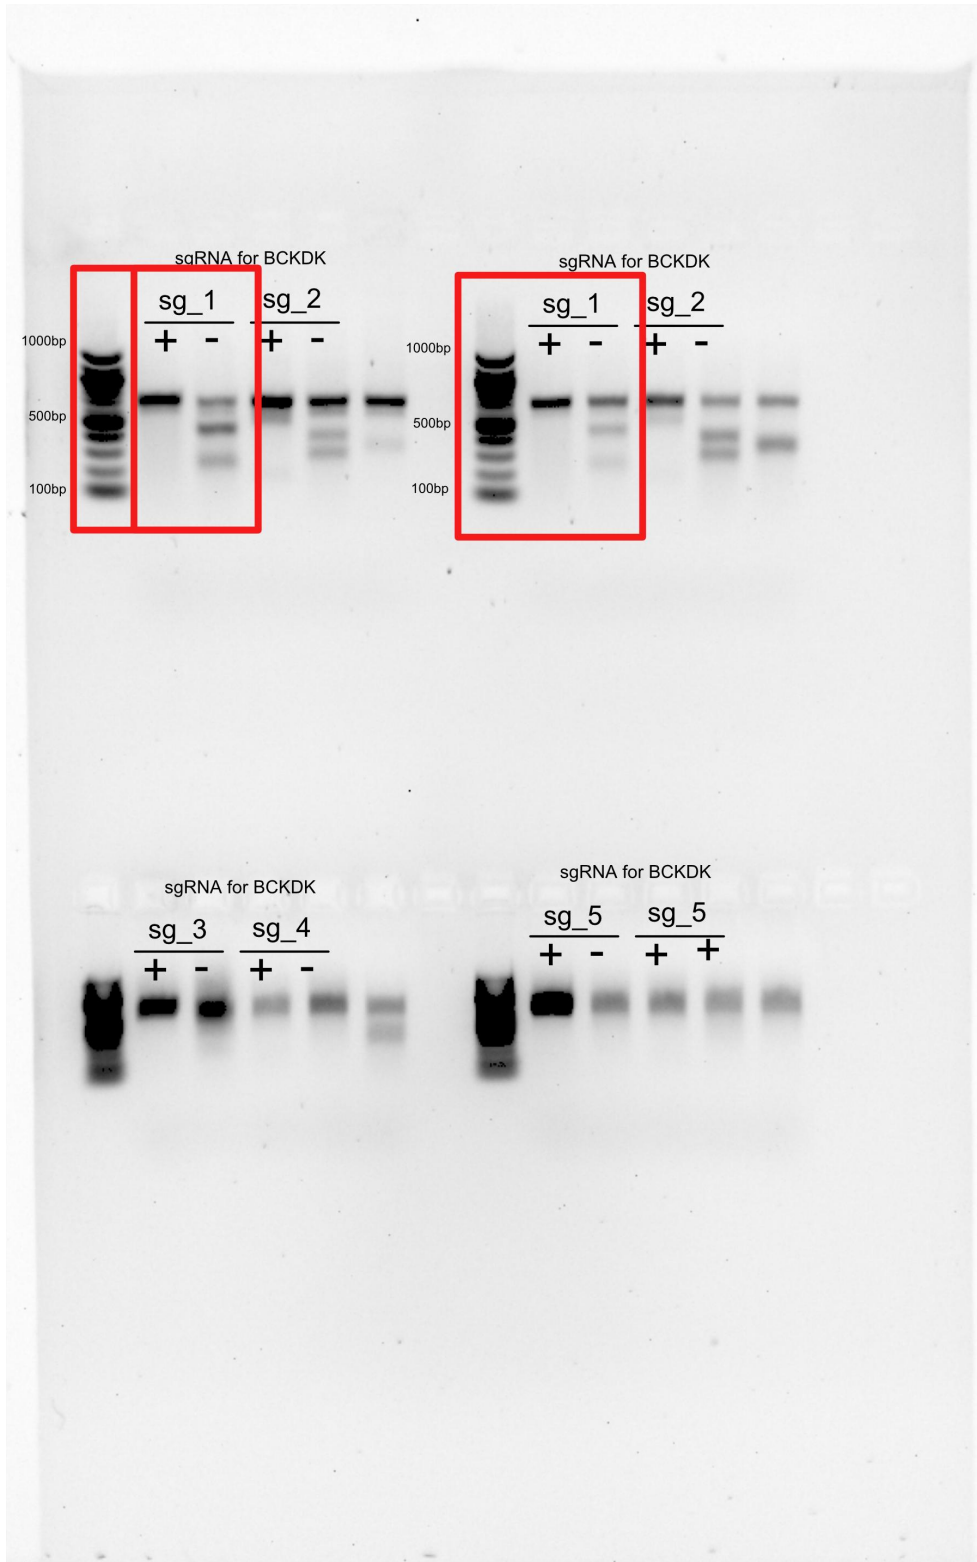

**Figure S2 The original, unaltered images of Figure 3F**

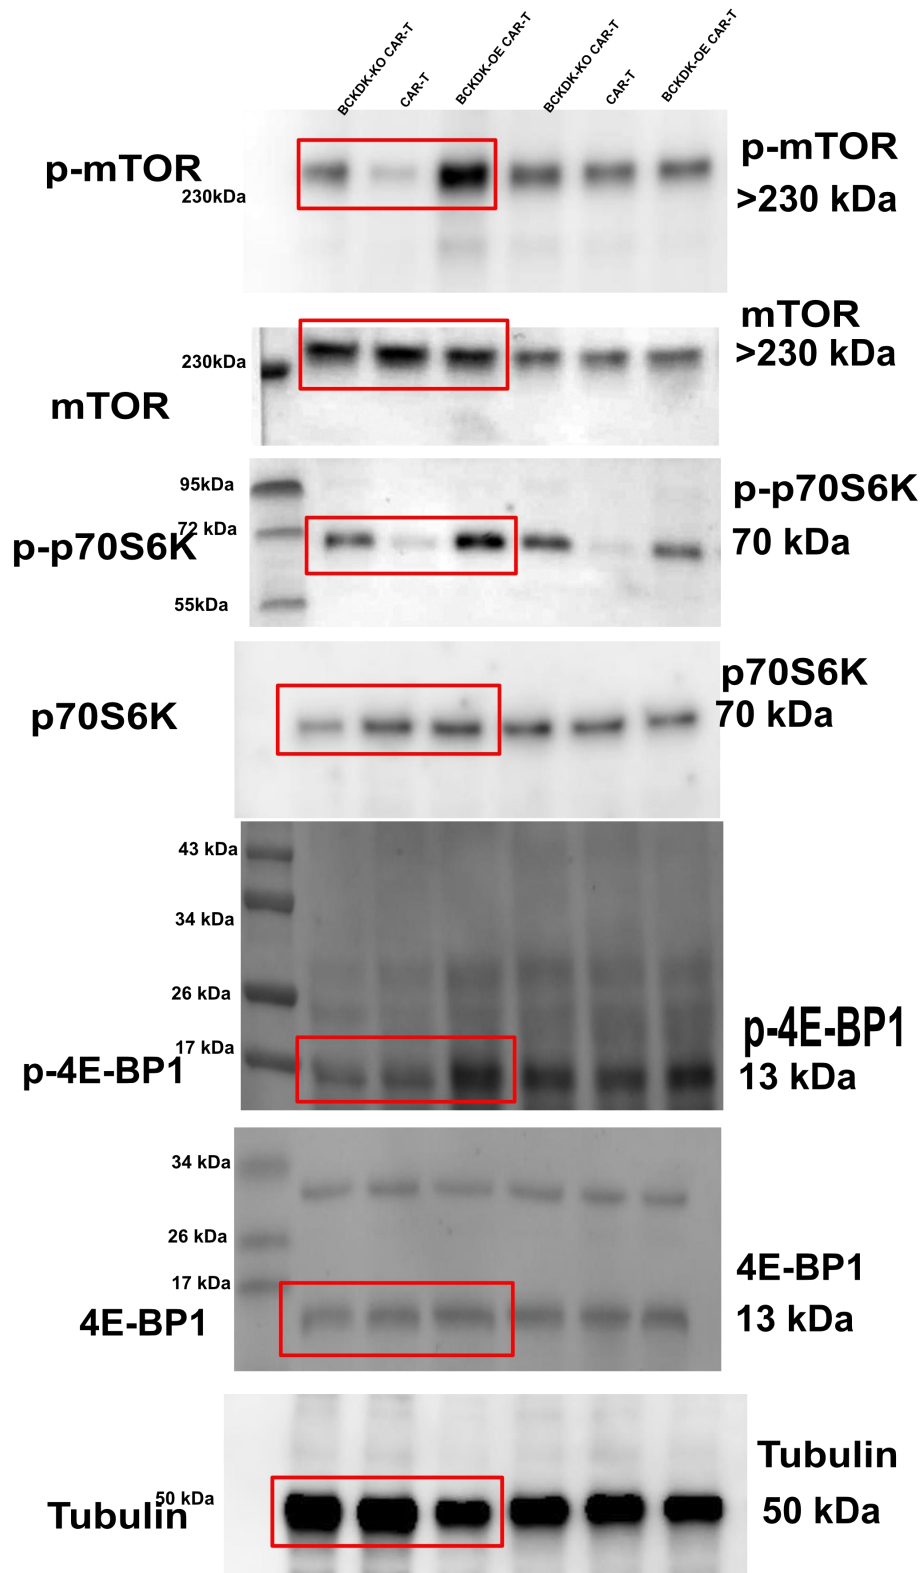

**Figure S3** The original, unaltered images of Figure 5D
